# Supplementary material for: Mitochondria-targeting and cell-penetrating peptides-co-modified HPMA copolymers for enhancing therapeutic efficacy of α-tocopheryl succinate
Source: Royal Society of Chemistry journal article supplement (doi:10.1039/c8tb02621a), 2018-01-01
Supplement: c8tb02621a1.pdf [file c8tb02621a1.pdf]

## Supplementary Information

### Mitochondrial targeting and cell penetrating peptides co-modified HPMA copolymers for enhancing therapeutic efficacy of $\alpha$ -tocopheryl succinate

Yanxi Liu,<sup>a</sup> Qiuyi Li,<sup>a</sup> Xiaofeng Xiong,<sup>a</sup> Yuan Huang,<sup>a</sup> Zhou Zhou\*<sup>a</sup>

Key Laboratory of Drug Targeting and Drug Delivery System of the Education Ministry,  
West China School of Pharmacy, Sichuan University, NO. 17, Block 3, South Renmin  
Road, Chengdu 610041, PR China

Tel.: +86-28-85502959, Fax: +86-28-85501617

E-mail: zhou\_zhou610@163.com

#### Table of contents:

|                                                                                                             |     |
|-------------------------------------------------------------------------------------------------------------|-----|
| Scheme S1: Synthesis of $\alpha$ -tocopheryl succinate derivative.....                                      | S1  |
| Scheme S2: <sup>1</sup> H NMR spectrum of $\alpha$ -tocopheryl succinate ( $\alpha$ -TOS) and APMA-TOS..... | S2  |
| Scheme S3: Synthesis scheme of P-TOS-SS20-dNP2.....                                                         | S3  |
| Scheme S4: Structure of P-FITC-SS20-dNP2.....                                                               | S4  |
| Table S1: Key characteristics of HPMA copolymers synthesized with different functional groups .....         | S5  |
| Figure S1: Size-exclusion chromatography (SEC) profiles of synthesized HPMA copolymer conjugates .....      | S6  |
| Figure S2: UV-vis spectrum and absorbance calibration graph of free $\alpha$ -TOS and FITC.....             | S7  |
| Figure S3: <i>In vitro</i> cytotoxicity of various concentrations of drug-free P-SS20-dNP2 copolymer.....   | S8  |
| Figure S4: The growth inhibition of HeLa three-dimensional multicellular tumor spheroids.....               | S9  |
| Figure S5: Apoptosis rate of HeLa cells.....                                                                | S10 |
| Figure S6: The migration images of HeLa cells.....                                                          | S11 |

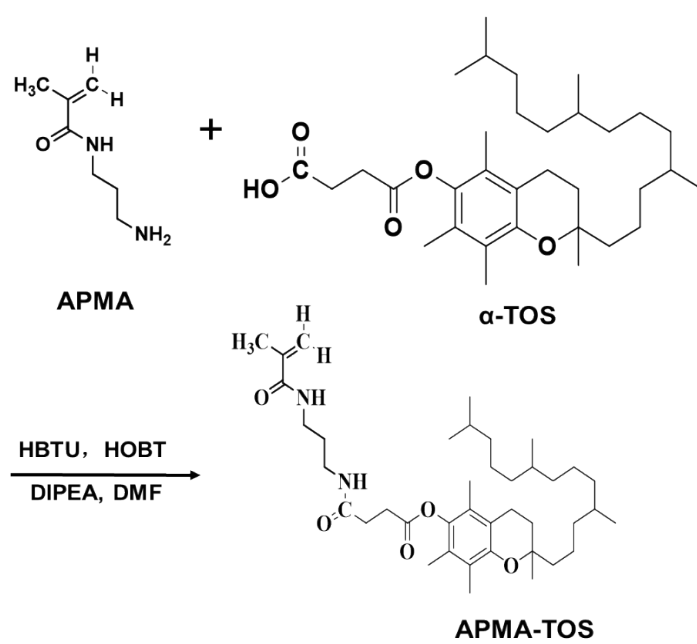

Scheme S1. Synthesis of  $\alpha$ -tocopheryl succinate derivative (APMA-TOS).

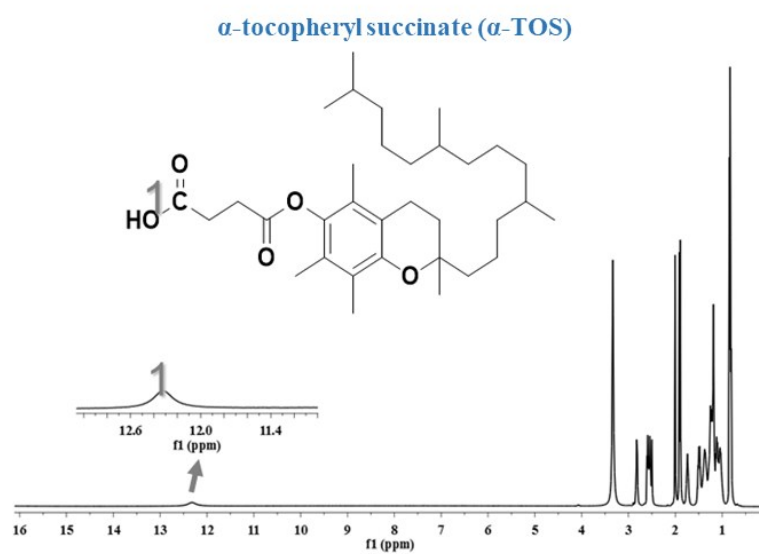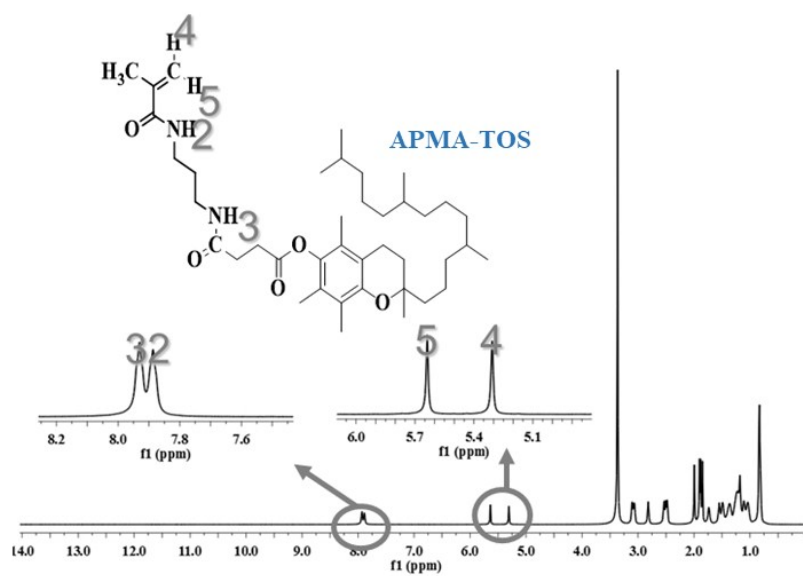

Scheme S2.  $^1\text{H}$  NMR spectrum of  $\alpha$ -tocopheryl succinate ( $\alpha$ -TOS) and APMA-TOS.





Table S1. Key characteristics of HPMA copolymers synthesized with different functional groups.

| <b>Polymer NO.</b> | <b>HPMA copolymers</b> | <b>Mw (kDa)</b> | <b>PDI</b> | <b>FITC (wt%)</b> | <b>TOS (wt%)</b> | <b>SS20 peptide content (μmol/g)</b> | <b>dNP2 peptide content (μmol/g)</b> |
|--------------------|------------------------|-----------------|------------|-------------------|------------------|--------------------------------------|--------------------------------------|
| 1                  | P-FITC                 | 22.6            | 1.43       | 4.84              | -                | -                                    | -                                    |
| 2                  | P-FITC-SS20            | 26.6            | 1.50       | 3.86              | -                | 198                                  | -                                    |
| 3                  | P-FITC-SS20-dNP2       | 31.7            | 1.24       | 3.14              | -                | 195                                  | 70                                   |
| 4                  | P-FITC-dNP2            | 28.9            | 1.65       | 3.71              | -                | -                                    | 72                                   |
| 5                  | P-TOS                  | 25.9            | 1.53       | -                 | 7.65             | -                                    | -                                    |
| 6                  | P-TOS-SS20             | 28.4            | 1.34       | -                 | 6.47             | 193                                  | -                                    |
| 7                  | P-TOS-SS20-dNP2        | 35.3            | 1.65       | -                 | 5.14             | 189                                  | 68                                   |

Abbreviations: Mw, weight-averaged molecular weight; PDI, polydispersity index; TOS, α-tocopheryl succinate.

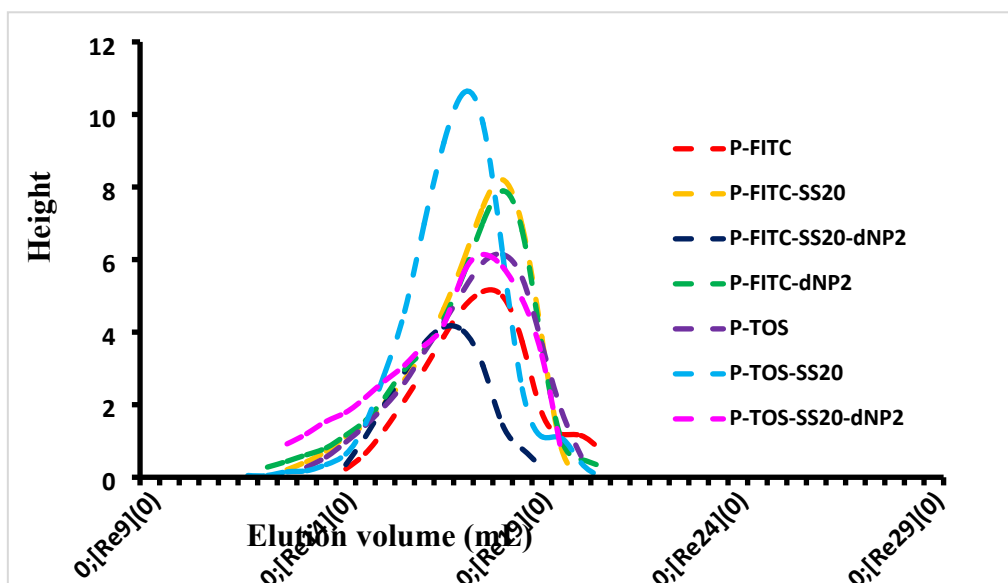

Figure S1. Size-exclusion chromatography (SEC) profiles of synthesized HPMA copolymer conjugates.

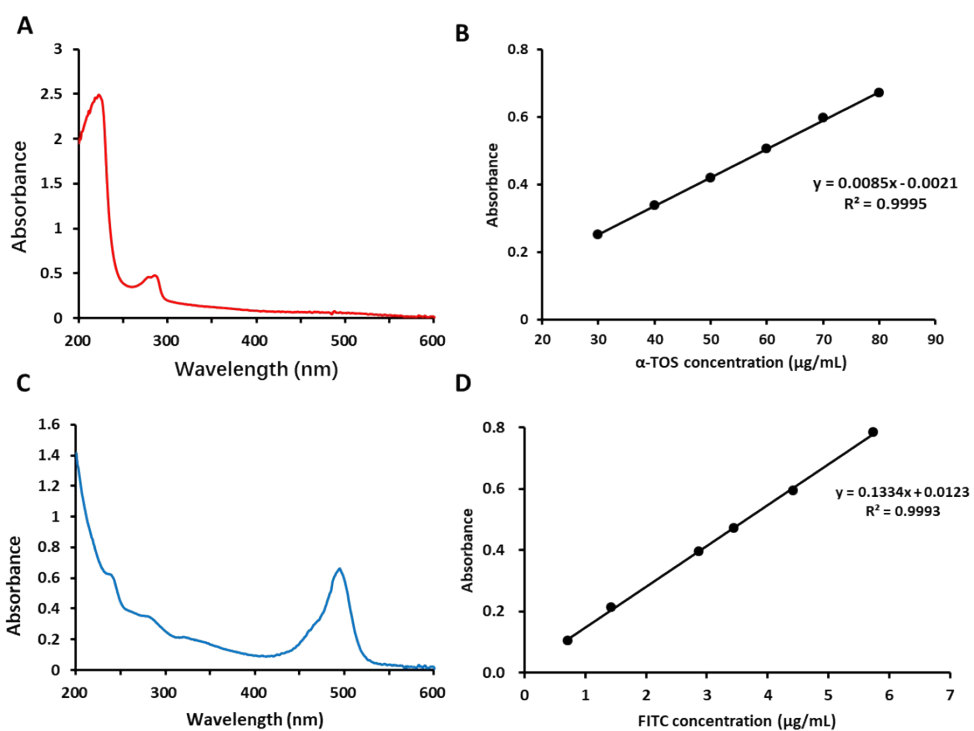

Figure S2. (A) UV-vis spectrum of free  $\alpha$ -TOS and (B) concentration versus absorbance calibration graph of  $\alpha$ -TOS determined by UV-vis spectroscopy. (C) UV-vis spectrum of FITC and (D) concentration versus absorbance calibration graph of FITC determined by UV-vis spectroscopy.



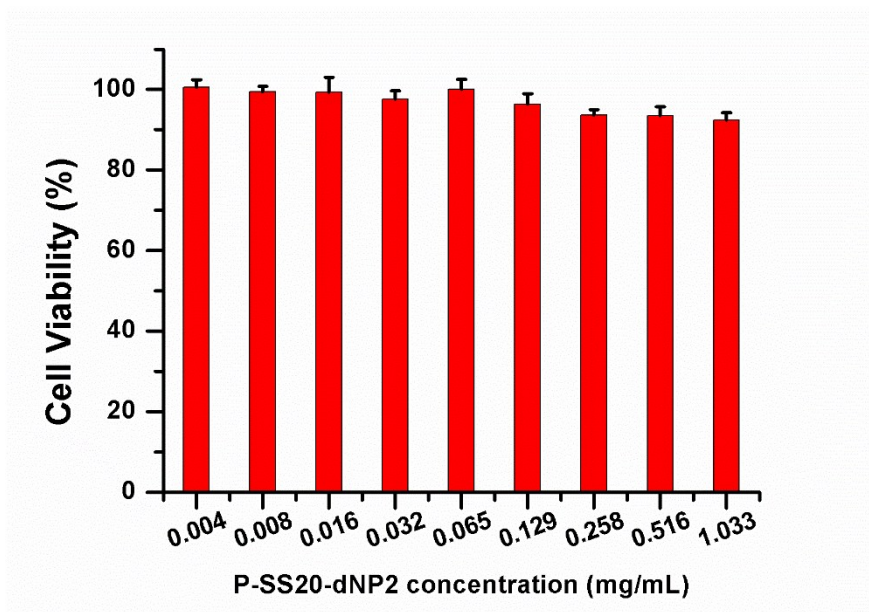

Figure S3. *In vitro* cytotoxicity of various concentrations of drug-free P-SS20-dNP2 copolymer on HeLa cells for 48 h (n=5).

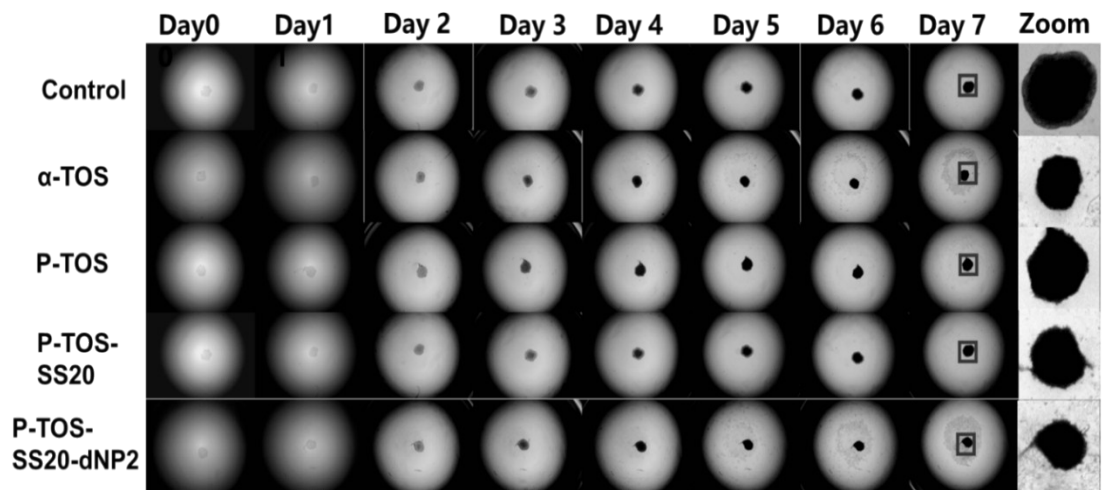

Figure S4. The growth inhibition of HeLa three-dimensional multicellular tumor spheroids treated with  $\alpha$ -TOS, P-TOS, P-TOS-SS20 and P-TOS-SS20-dNP2 ( $\alpha$ -TOS equivalent concentration 200  $\mu$ M).

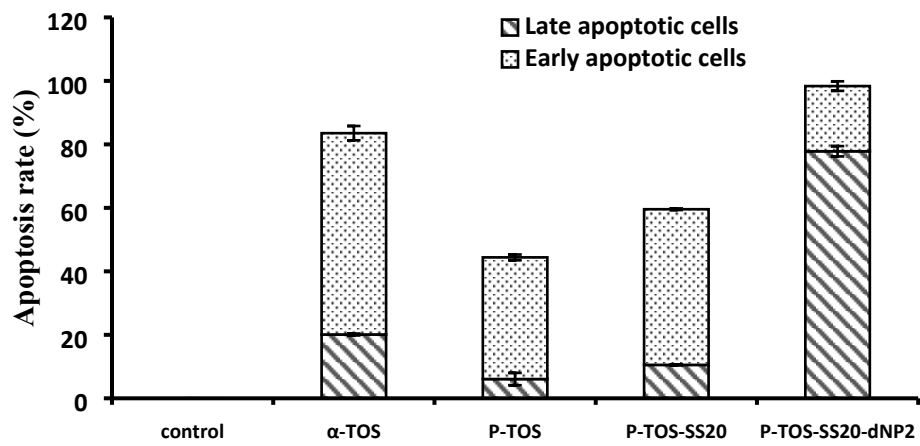

Figure S5. Apoptosis rate of HeLa cells treated with  $\alpha$ -TOS, P-TOS, P-TOS-SS20 and P-TOS-SS20-dNP2. (n=3)

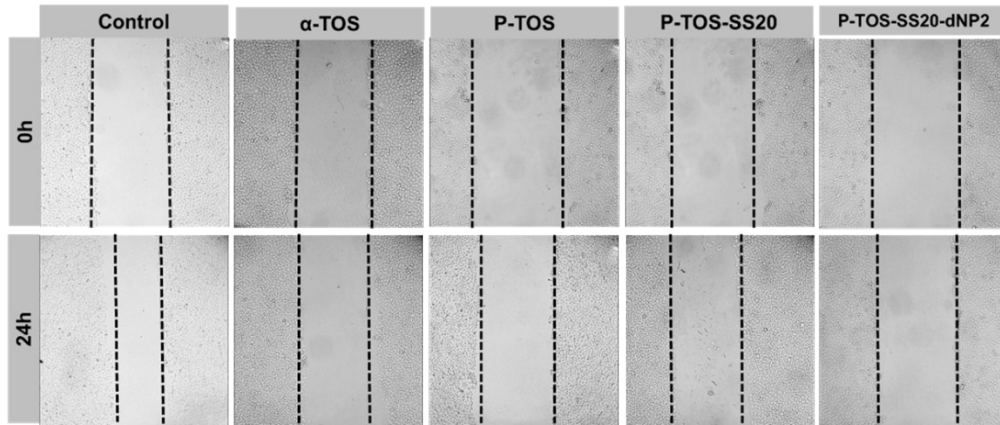

Figure S6. The migration images of HeLa cells mediated by  $\alpha$ -TOS, P-TOS, P-TOS-SS20 and P-TOS-SS20-dNP2.
